# Supplementary material for: An age-related numerical and functional deficit in CD19+CD24hiCD38hi B cells is associated with an increase in systemic autoimmunity
Source: PubMed Central journal article supplement (PMC3814412; doi:10.1111/acel.12114), 2013-07-19
Supplement: acel0012-0873-SD1.pdf [file acel0012-0873-SD1.pdf]

# Supplementary figures

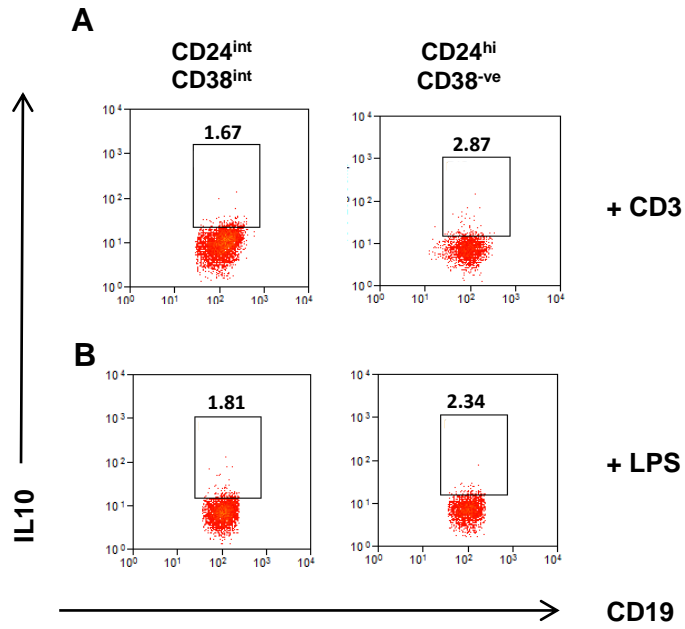

Figure 1

# Supplementary figures

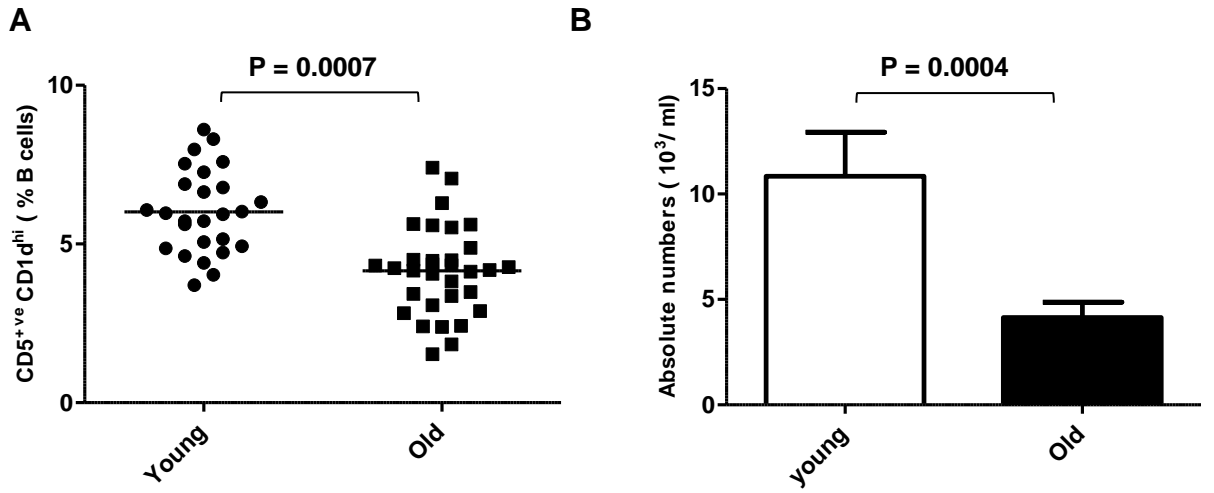

Figure 2
